# Supplementary material
Source: MDPI journal article supplement (https://www.mdpi.com/1999-4907/13/2/339)
Supplement: s1 [file s1]

**Table S1.** Soil particle composition of different forest types and soil layer

| Forest types | Soil layer | Soil particle composition (%) |           |           |           |            |            |             |            |            |            |           |
|--------------|------------|-------------------------------|-----------|-----------|-----------|------------|------------|-------------|------------|------------|------------|-----------|
|              |            | <2μm                          | 2-5.5μm   | 5.5-11μm  | 11-22μm   | 22-62μm    | 62-125μm   | 0.125-0.2mm | 0.2-0.3mm  | 0.3-0.6mm  | 0.6-1.2mm  | 1.2-2mm   |
| BMF          | 0-10cm     | 0.11±0.19                     | 2.66±3.56 | 3.15±3.29 | 5.51±5.09 | 10.42±6.58 | 9.91±1.76  | 13.7±1.67   | 9.92±4.38  | 32.19±5.88 | 10.75±8.61 | 1.63±1.65 |
| CBMF         | 0-10cm     | 0±0                           | 2.64±2.01 | 3.77±1.22 | 4.58±1.1  | 9.78±0.23  | 9.53±4.13  | 12.4±3.5    | 10.52±7.8  | 30.2±1.59  | 12.2±4.98  | 4.38±7.59 |
| FF           | 0-10cm     | 0±0                           | 2.71±2.6  | 3.94±1.99 | 5.13±2.9  | 10.45±4.55 | 5.55±2.62  | 9.42±3.03   | 1.35±1.15  | 32.25±12.5 | 23.93±5.33 | 5.28±3.03 |
| BF           | 0-10cm     | 0±0                           | 3.97±2.13 | 5.2±1.87  | 6.17±1.76 | 11.66±2.04 | 9.55±2.74  | 8.89gh±4.45 | 5.75±2.18  | 26.92±10.7 | 19.26±6.26 | 2.65±3.62 |
| BMF          | 10-20cm    | 0±0                           | 2.26±1.51 | 3.55±1.4  | 4.91±0.82 | 10.26±2.04 | 7±4.62     | 14.93±1.56  | 8.13±6.49  | 31.57±1.23 | 14.79±6.3  | 2.61±2.73 |
| CBMF         | 10-20cm    | 0±0                           | 2.94±0.66 | 4.52±0.43 | 6.35±1.31 | 14.33±3.73 | 15.11±2.63 | 14.44±1.66  | 10.74±3.41 | 25.74±1.41 | 3.84±3.42  | 1.99±2.18 |
| FF           | 10-20cm    | 0±0                           | 3.31±1.8  | 4.85±1.96 | 5.97±2.95 | 12.36±4.5  | 8.87±2.18  | 11.15±3.34  | 6.6±4.25   | 35.58±2.14 | 8.8±6.74   | 1.83±3.17 |
| BF           | 10-20cm    | 0±0                           | 2.63±1.28 | 4.2±0.95  | 5.97±0.84 | 11.99±2.44 | 11.44±1.4  | 12.92±3.3   | 13.89±1.55 | 25.2±1.52  | 11.43±4.37 | 0.33±0.57 |
| BMF          | 20-30cm    | 0±0                           | 2.84±2.28 | 3.8±1.59  | 5.58±2.76 | 10.58±3.89 | 13.22±3.22 | 13.46±4.52  | 15.25±0.72 | 25.49±2.58 | 8.88±10.74 | 0.9±1.55  |
| CBMF         | 20-30cm    | 0±0                           | 2.97±0.9  | 4.19±0.85 | 5.67±1.57 | 12.68±3.7  | 12.66±3.12 | 16.82±4.19  | 7.47±6.21  | 27.94±2.46 | 7.26±7.94  | 2.34±4.05 |
| FF           | 20-30cm    | 0±0                           | 2.19±1.1  | 3.99±0.45 | 5.74±0.66 | 11.15±0.71 | 9.44±0.1   | 11.03±2.96  | 11.12±1.5  | 29.51±3.71 | 15.34±2.87 | 0.49±0.04 |
| BF           | 20-30cm    | 0±0                           | 2.2±1.51  | 4.26±0.91 | 6.5±1.77  | 12.46±3.36 | 11.08±1.88 | 13.66±5.85  | 11.24±1.7  | 24.52±6.48 | 12.93±6.44 | 1.14±1.65 |

Note: BMF, broad-leaved forest; CBF, coniferous and broad-leaved forest; FF, Chinese fir forest; BF, bamboo forest.

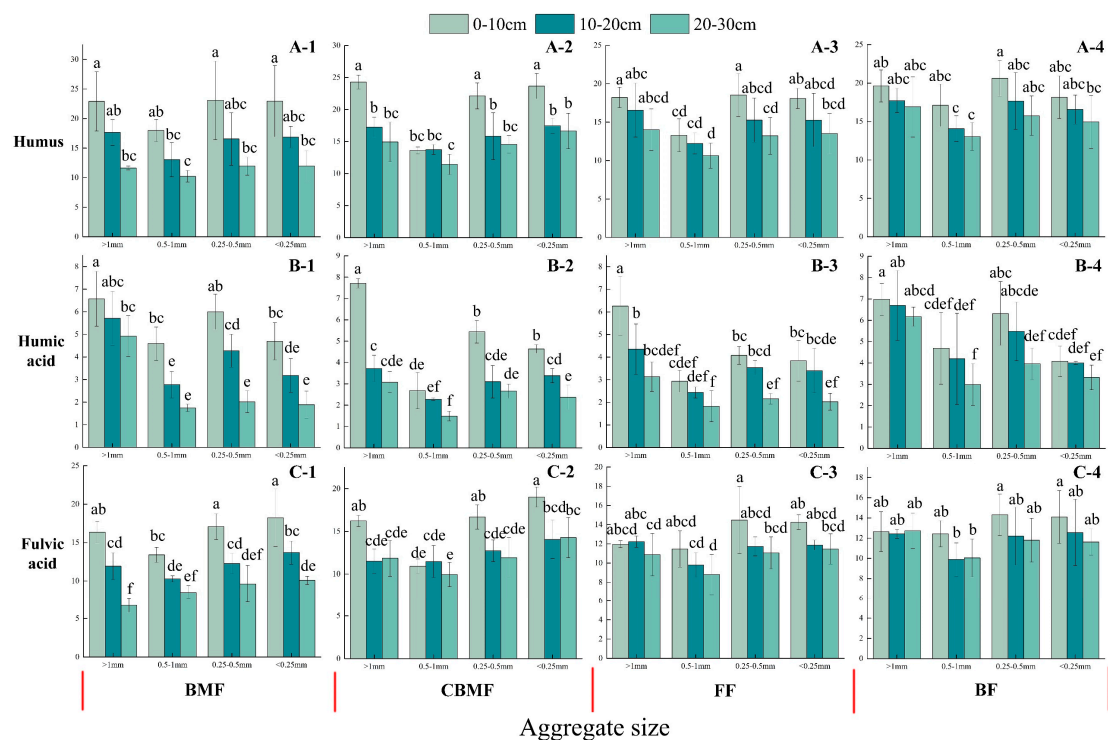

**Figure S1.** Distribution of aggregate-associated humic substances. (A-), (B-) and (C-) represent aggregate-associated humus, humic acids and fulvic acids; (-1) to (-4) represent BMF,CBMF, FF and BF.
